# Supplementary material
Source: publisher figshare collection journal article supplement (https://gsapubs.figshare.com/articles/dataset/_/15900132)
Supplement: Supplementary file 1 [file 1]

## Sheet: Table
Table S2. 40Ar/39Ar isotopic data for white mica, Kalymnos, Greece
Sample*	Watts	40Ar	±1s	39Ar	±1s	38Ar	±1s	37Ar	±1s	36Ar	±1s	39Ar mol†	Ca/K	±1s	Cl/K	±1s	37Ar/39Ar	±1s	38Ar/39Ar	±1s	40Ar/39Ar	±1s	40Ar*/39Ar	±1s	%40Ar*	Age†† (Ma)	±1s
KA002 schist; zone 35, 4092800.36,493796.42 (J: 3.530x10-3 ± 0.020)
A	0.25	1799173	979.793	31259.7	91.8698	390.358	10.2698	13.2402	21.2908	0	0	0.11021	0.0008302	0.0013349	0.0126265	1.36515e-07	0.0004236	0.0006811	0.0124876	0.0003306	57.5557	0.172032	58.0939	0.200832	100.94	336.539	1.06136
B*	0.3	176874	76.2556	2964.13	11.4905	36.8742	1.62841	0	0	0	0	0.0104505	0	0	0.0105572	3.10851e-07	0	0	0.0124402	0.0005515	59.6714	0.232742	59.7315	0.304598	100.106	345.173	1.60205
C*	0.35	23545.8	56.1059	392.636	4.25858	7.32421	1.23979	0	0	3.69465	2.10983	0.00138429	0	0	0.0366441	2.16456e-06	0	0	0.018654	0.0031641	59.9687	0.66594	57.1524	1.72584	95.3107	331.557	9.1459
D*	0.4	47499.1	52.6526	804.656	4.13578	13.1977	1.3646	2.07948	4.2795	1.55595	2.01288	0.00283693	0.0050653	0.0104241	0.0316509	1.06599e-06	0.0025843	0.0053184	0.0164017	0.001698	59.0303	0.310381	58.4504	0.807699	99.0226	338.423	4.26406
E*	0.45	42681.2	50.3762	737.258	7.988	7.68421	1.44272	0	0	0	0	0.00259931	0	0	0	0	0	0	0.0104227	0.0019601	57.8918	0.630954	58.2962	1.00385	100.705	337.608	5.30201
F*	0.5	85834.8	65.4893	1452.37	7.988	20.7334	1.44264	0	0	6.06923	2.3165	0.00512053	0	0	0.0165319	5.45675e-07	0	0	0.0142756	0.0009964	59.0999	0.328161	57.8491	0.574505	97.8887	335.245	3.03831
G*	0.55	163542	79.6094	2776.06	12.6267	39.0832	2.08337	0	0	4.84067	1.99558	0.0097874	0	0	0.0180865	3.33123e-07	0	0	0.0140786	0.0007532	58.9115	0.269484	58.3879	0.342679	99.1163	338.093	1.80943
H*	0.6	223972	99.1799	3716.69	10.1164	43.8422	1.86057	0	0	2.12338	1.88818	0.0131037	0	0	0.0058611	1.93237e-07	0	0	0.011796	0.0005016	60.2611	0.16618	60.0876	0.224671	99.717	347.045	1.18045
I*	0.65	291251	110.279	4840.43	11.3711	56.8075	1.76084	3.47307	3.9145	4.2469	2.2031	0.0170656	0.0014063	0.0015851	0.0051632	1.62093e-07	0.0007175	0.0008087	0.011736	0.0003648	60.1705	0.143176	59.9057	0.196974	99.5648	346.089	1.03547
J*	0.7	311234	164.43	5161.25	16.3986	64.7186	1.76961	0	0	0	0	0.0181967	0	0	0.0117064	1.54027e-07	0	0	0.0125393	0.0003452	60.3021	0.194225	60.5123	0.252912	100.354	349.275	1.32719
K*	0.75	345540	119.408	5707.41	13.8849	73.5139	1.89384	0	0	2.41435	1.98292	0.0201223	0	0	0.0124571	1.80802e-07	0	0	0.0128804	0.0003333	60.5423	0.148765	60.413	0.181128	99.7914	348.754	0.950761
L*	0.8	245511	126.897	4036.06	12.6289	50.8715	1.64934	0	0	0	0	0.0142297	0	0	0.0118975	2.40829e-07	0	0	0.0126042	0.0004106	60.8294	0.192915	60.9877	0.246812	100.266	351.768	1.29339
M*	0.9	117073	58.8643	1956.07	7.86533	24.1484	1.74182	0	0	0	0	0.00689641	0	0	0.0108545	4.97935e-07	0	0	0.0123453	0.0008919	59.8508	0.242533	60.1407	0.422932	100.49	347.324	2.22178
N*	1.1	83859.4	65.4655	1413.9	6.71813	13.9039	1.44632	2.46487	4.59265	1.50439	2.26774	0.00498491	0.0034169	0.0063665	0	0	0.0017433	0.0032482	0.0098337	0.001024	59.3107	0.285592	58.9902	0.556809	99.4646	341.27	2.93491
O*	1.5	86576.5	67.8897	1446.2	7.70341	21.3609	1.43177	6.01634	5.05557	5.20797	2.5758	0.00509879	0.0081538	0.0068518	0.0201128	7.00683e-07	0.0041601	0.0034958	0.0147703	0.0009931	59.8648	0.322315	58.7872	0.618917	98.2047	340.2	3.26421
P*	3.5	127707	76.422	2167.13	9.68766	26.1467	1.56903	6.80492	4.58585	0.391803	1.98376	0.00764053	0.0061545	0.0041476	0.0078937	4.24147e-07	0.0031401	0.0021161	0.0120651	0.000726	58.9291	0.265779	58.8725	0.38107	99.9089	340.649	2.00929
Q*	6	81043.9	59.1439	1326.17	5.46012	17.8323	1.64161	0	0	2.71653	2.14232	0.00467559	0	0	0.0139969	6.43835e-07	0	0	0.0134465	0.0012391	61.1114	0.25553	60.4966	0.544669	98.9991	349.193	2.85834
																										Tg: 342 ± 4 Ma
																										Tp: 346 ± 6 Ma
KA002 schist; zone 35, 4092800.36,493796.42 (J: 3.530x10-3 ± 0.020)
A	0.2	12691.1	51.955	387.254	3.854	10.7124	1.36456	25.6623	5.09847	20.4121	2.59704	0.00136532	0.129884	0.0258371	0.0416783	2.64216e-06	0.0662673	0.0131822	0.0276623	0.0035344	32.7719	0.352666	17.0384	2.01402	51.9933	105.372	12.0987
B	0.25	29132.3	63.9832	626.103	4.59721	15.2624	1.54314	7.04716	4.81137	10.5993	3.12979	0.00220741	0.022061	0.0150628	0.0621835	1.54035e-06	0.0112556	0.0076851	0.0243768	0.0024712	46.5297	0.356605	41.474	1.52669	89.1397	246.497	8.48113
C	0.3	31389.7	57.707	591.183	6.98669	4.639	1.42061	0	0	3.4461	3.03523	0.0020843	0	0	0	0	0	0	0.007847	0.0024048	53.0965	0.635049	51.3518	1.65155	96.7202	300.552	8.90395
D	0.35	44702.4	49.5355	802.173	6.49735	11.804	1.22756	8.75268	5.32692	1.67919	2.1525	0.00282817	0.021386	0.0130168	0.0214717	1.33112e-06	0.0109112	0.0066412	0.0147151	0.0015349	55.7266	0.455573	55.1001	0.919179	98.8803	320.648	4.90064
E	0.4	190502	189.883	3364.87	16.4505	42.2165	2.01128	10.8794	6.15546	9.83466	2.58756	0.0118633	0.0063371	0.0035856	0.0076818	3.66673e-07	0.0032332	0.0018294	0.0125462	0.0006009	56.6149	0.282478	55.7397	0.360796	98.4592	324.055	1.91997
F*	0.45	439684	239.934	7534.87	25.2758	87.5992	2.14089	10.9326	6.28201	0	0	0.0265652	0.0028438	0.0016341	0.0057059	1.6711e-07	0.0014509	0.0008337	0.0116258	0.0002868	58.3532	0.19832	58.4079	0.232055	100.099	338.198	1.22523
G*	0.5	613924	315.285	10108.4	27.7867	126.412	2.28901	2.97558	6.27842	4.86901	1.94455	0.0356385	0.000577	0.0012174	0.0101698	1.24492e-07	0.0002944	0.0006211	0.0125057	0.000229	60.7343	0.16984	60.5876	0.17894	99.7634	349.67	0.938801
H*	0.55	207244	124.822	3368.21	11.2803	40.0563	1.64412	0	0	1.71503	1.9413	0.0118751	0	0	0.006502	3.73566e-07	0	0	0.0118924	0.0004898	61.5295	0.20937	61.3744	0.270639	99.7528	353.793	1.41665
I*	0.6	79573.4	51.4713	1337.3	6.75791	15.3469	1.38257	3.39276	6.28374	0	0	0.00471484	0.0049726	0.0092097	0.0078586	9.41809e-07	0.002537	0.0046988	0.011476	0.0010355	59.5031	0.303146	60.3702	0.530892	101.462	348.529	2.78707
J*	0.65	27972.3	45.2978	490.367	4.20515	3.93443	1.29953	0	0	0.0251993	1.84196	0.00172886	0	0	0	0	0	0	0.0080234	0.002651	57.0437	0.497825	57.0219	1.22695	99.969	330.865	6.50458
K*	0.7	9817.74	46.3867	183.422	2.45463	1.88807	1.2309	0	0	0	0	0.000646679	0	0	0.0160822	5.52662e-06	0	0	0.0102936	0.0067122	53.5256	0.759637	58.4572	3.26001	109.224	338.458	17.2101
L*	0.75	14247	44.2179	253.08	3.36966	3.90922	1.25292	0	0	0	0	0.000892269	0	0	0.0358705	4.6374e-06	0	0	0.0154466	0.004955	56.2944	0.769634	58.3498	2.53382	103.66	337.891	13.3807
M*	0.8	11471	36.8816	204.521	2.63695	0	0	3.99031	4.81083	0	0	0.000721066	0.0382407	0.0461067	0	0	0.0195106	0.0235238	0	0	56.0872	0.745295	60.7872	2.7139	108.384	350.717	14.2301
N*	0.9	102633	93.455	1735.63	8.47411	18.171	1.50876	0.38201	5.28474	0.402375	1.67878	0.00611922	0.0004314	0.0059679	0	0	0.0002201	0.0030448	0.0104694	0.0008708	59.1328	0.29369	59.0606	0.41166	99.883	341.641	2.16939
O*	1.1	111767	56.7371	1827.31	6.84548	18.6513	1.19076	1.45901	5.55837	0.904978	1.97633	0.00644243	0.001565	0.005962	0	0	0.0007985	0.0030418	0.010207	0.0006528	61.1649	0.231231	61.0141	0.396859	99.7583	351.906	2.07952
P*	1.5	54259.9	56.7371	895.752	10.7335	6.58103	1.3284	4.74074	6.21522	0	0	0.0031581	0.0103732	0.0136001	0	0	0.0052925	0.0069388	0.0073469	0.0014856	60.5747	0.728602	60.7774	0.961394	100.339	350.666	5.04113
Q*	3.5	29108.9	35.1679	497.626	4.02787	6.94413	1.3641	6.40705	4.19658	1.2052	1.77541	0.00175445	0.0252354	0.0165303	0.0165944	1.69043e-06	0.0128752	0.0084338	0.0139545	0.0027435	58.4956	0.478718	57.7712	1.1655	98.7658	334.833	6.16525
R	6	5132.57	28.9386	81.565	2.24533	2.3683	1.39182	11.2448	5.74704	1.63138	1.97877	0.000287569	0.270211	0.138301	0.0863975	1.41e-05	0.137863	0.0705617	0.0290358	0.0170827	62.9261	1.7682	56.969	7.4203	90.5291	330.585	39.3443
																										Tg: 338 ± 4 Ma
																										Tp: 350 ± 7 Ma
KA003 schist; zone 35, 4100014.12, 493134.39 (J: 3.526x10-3 ± 0.020)
A	0.25	63162	57.9394	5852.98	15.1279	123.891	2.71436	51.0774	4.5919	145.117	3.44074	0.0206355	0.0171044	0.0015383	0.0343573	1.57313e-07	0.0087267	0.0007849	0.0211671	0.000467	10.7914	0.0295966	3.38695	0.176032	31.3941	21.4192	1.10665
B	0.3	26349.4	50.7671	2001.59	8.7174	33.7568	1.85378	6.50674	3.84177	36.4159	2.15634	0.00705687	0.0063716	0.0037621	0.0162226	3.84716e-07	0.0032508	0.0019194	0.016865	0.0009291	13.1643	0.0626933	7.72978	0.324412	58.7311	48.5164	2.00906
C	0.35	57007.6	152.015	2796.89	17.6442	48.6389	1.8605	28.5235	4.11446	37.6738	3.28766	0.00986083	0.0199887	0.0028861	0.0246191	2.95137e-07	0.0101983	0.0014725	0.0173904	0.0006742	20.3825	0.139599	16.359	0.369847	80.2714	101.18	2.22454
D	0.4	90005.9	99.3965	3687.66	11.3778	60.4723	2.25935	17.1534	4.3363	40.5033	2.71694	0.0130014	0.0091171	0.0023049	0.0215161	2.35707e-07	0.0046516	0.001176	0.0163985	0.0006148	24.4073	0.0799843	21.1257	0.231022	86.565	129.625	1.3678
E	0.45	68643.1	67.866	2481.62	10.2493	31.7203	2.01378	8.26935	4.39521	14.4166	1.96586	0.0087493	0.0065312	0.0034715	0.0058537	3.55e-07	0.0033322	0.0017712	0.0127821	0.0008132	27.6606	0.117469	25.9235	0.261075	93.73	157.81	1.52177
F	0.5	207361	99.3965	6369.37	15.1448	83.2552	2.05311	20.147	4.31787	16.7457	1.96805	0.0224561	0.0061997	0.0013288	0.011123	1.35885e-07	0.0031631	0.000678	0.0130712	0.0003238	32.556	0.0789673	31.7684	0.120281	97.5897	191.562	0.688109
G*	0.55	9912573	9527.65	242049	1250.96	2920.5	50.4211	431.028	102.797	68.9116	53.9555	0.853378	0.0034903	0.0008326	0.0077811	8.51433e-08	0.0017807	0.0004248	0.0120658	0.0002174	40.9528	0.215281	40.865	0.224939	99.7929	242.865	1.25076
H	0.6	449736	240.59	11372.2	20.1618	137.495	3.00636	5.63197	4.23581	20.8433	2.49024	0.0400943	0.0009707	0.00073	0.0061968	7.4656e-08	0.0004952	0.0003725	0.0120905	0.0002652	39.5469	0.0732352	38.9968	0.0975142	98.6164	232.447	0.545363
I	0.65	261531	178.146	6696.77	25.1965	81.6358	2.01963	12.8565	4.54608	20.4095	2.13024	0.0236104	0.0037628	0.0013306	0.0054313	1.36072e-07	0.0019198	0.0006789	0.0121903	0.0003051	39.0533	0.149326	38.1406	0.174157	97.6704	227.653	0.976593
J	0.7	191722	128.542	4774.44	15.1289	60.4297	1.56238	7.75171	4.83766	12.3636	2.68151	0.016833	0.0031822	0.001986	0.0087103	2.03091e-07	0.0016236	0.0010133	0.0126569	0.0003297	40.1559	0.13006	39.38	0.210769	98.075	234.589	1.17736
K	0.75	164776	75.3503	4119.93	11.1184	57.0262	1.76214	7.5078	4.75542	0	0	0.0145254	0.0035717	0.0022623	0.0187669	2.31353e-07	0.0018223	0.0011543	0.0138416	0.0004293	39.9948	0.109472	40.0286	0.178275	100.092	238.208	0.993852
L	0.8	139915	103.301	3394.66	13.8816	44.4101	1.64592	3.10872	5.06601	0	0	0.0119684	0.0017949	0.002925	0.0143391	2.99118e-07	0.0009158	0.0014923	0.0130823	0.0004878	41.2161	0.171268	41.2698	0.276315	100.137	245.115	1.53452
M	0.9	237223	91.0714	5791.51	21.4272	70.6333	1.90074	6.95226	4.30177	3.36169	2.25024	0.0204188	0.0023528	0.0014559	0.0082228	1.48879e-07	0.0012004	0.0007428	0.012196	0.0003313	40.9605	0.152358	40.7844	0.191005	99.5772	242.417	1.06234
N	1.1	712155	265.733	16234.8	21.4419	206.923	2.7726	6.96375	4.50745	4.43327	1.98511	0.0572382	0.0008407	0.0005442	0.0118254	5.56487e-08	0.0004289	0.0002776	0.0127456	0.0001716	43.8659	0.0602029	43.7814	0.0703634	99.8144	259.01	0.387767
O	1.5	565098	203.217	12833.2	21.4419	159.571	2.81569	0	0	3.55265	1.88056	0.0452452	0	0	0.0099749	7.48638e-08	0	0	0.0124343	0.0002204	44.0341	0.0752577	43.9484	0.0869709	99.8123	259.93	0.479044
P	3.5	320458	118.919	7290.84	13.9043	93.2639	2.39929	0	0	4.22156	1.87948	0.0257049	0	0	0.0117581	1.21998e-07	0	0	0.0127919	0.00033	43.9535	0.0853957	43.7776	0.114749	99.6067	258.988	0.632381
Q	6	23965.4	54.9299	505.878	3.96407	7.56883	1.3707	0.463297	4.46696	9.40358	2.64235	0.00178354	0.001795	0.017307	0.0044941	1.76986e-06	0.0009158	0.0088301	0.0149618	0.0027121	47.374	0.386778	41.8212	1.59726	88.2845	248.175	8.8554
																										Tg: 235 ± 3 Ma
																										Tp: 243 ± 3 Ma
KA003 schist; zone 35, 4100014.12, 493134.39 (J: 3.526x10-3 ± 0.020)
A	0.25	29457.3	55.0937	3205.41	8.23287	57.9824	1.58021	0	0	33.9692	2.09586	0.0113011	0	0	0.031971	7.05276e-07	0	0	0.0180889	0.0004952	9.18985	0.0291983	6.02294	0.196603	65.5606	37.915	1.22472
B	0.3	45379.3	62.3298	2512.39	7.84684	31.2689	1.45681	8.44672	10.7139	12.5914	2.16223	0.00885779	0.0065896	0.0083583	0.0047515	8.54737e-07	0.003362	0.0042644	0.0124458	0.0005812	18.0622	0.061627	16.5633	0.263302	91.7163	102.408	1.58261
C	0.33	50714.9	60.0508	2224.01	5.3442	26.8308	1.32327	21.314	9.19481	4.16487	2.06803	0.00784106	0.0187839	0.0081034	0.0059978	8.28676e-07	0.0095836	0.0041344	0.0120641	0.0005957	22.8034	0.0610869	22.2423	0.284032	97.5516	136.224	1.67552
D	0.36	37645.2	50.079	1569.85	5.09486	20.5495	1.25653	23.9512	10.659	0	0	0.00553472	0.0299038	0.0133084	0.0146451	1.36094e-06	0.015257	0.00679	0.0130901	0.0008015	23.9801	0.0841103	24.104	0.385958	100.528	147.173	2.263
E	0.4	42420.6	44.8188	1651.28	9.85519	21.9869	1.31429	0	0	0	0	0.00582184	0	0	0.0158844	1.13702e-06	0	0	0.013315	0.0007999	25.6895	0.155704	25.7866	0.405724	100.391	157.012	2.36596
F	0.45	204431	83.1544	6392.46	17.6658	78.133	1.91437	27.1361	8.87374	17.5809	1.80111	0.0225375	0.0083202	0.0027209	0.0059562	2.78244e-07	0.004245	0.0013882	0.0122227	0.0003014	31.98	0.0893301	31.1564	0.121111	97.4335	188.057	0.694202
G	0.5	103546	68.897	3228.36	6.87623	42.1244	1.38078	26.0516	10.0451	3.48617	2.51065	0.011382	0.0158165	0.0060987	0.0127199	6.23665e-07	0.0080696	0.0031116	0.0130483	0.0004286	32.0739	0.0715714	31.7494	0.2428	98.9973	191.453	1.3891
H	0.53	115259	85.559	3552.91	8.1247	43.9117	1.40652	21.4007	11.0273	5.9092	2.18444	0.0125263	0.0118059	0.0060834	0.0079822	6.22099e-07	0.0060234	0.0031038	0.0123594	0.0003969	32.4406	0.0779951	31.9418	0.199052	98.471	192.553	1.13812
I	0.56	61924.4	62.3074	1966.12	6.30871	23.9761	1.29479	0	0	3.31887	1.83736	0.00693184	0	0	0.0069762	1.00745e-06	0	0	0.0121946	0.0006597	31.4957	0.105913	30.9887	0.297913	98.3997	187.096	1.70854
J	0.6	58314.2	59.9747	1827.63	5.69382	25.0646	1.16234	26.0143	10.5025	3.50757	2.0293	0.00644357	0.0278984	0.0112635	0.015732	1.15184e-06	0.0142339	0.0057467	0.0137142	0.0006374	31.907	0.10468	31.3327	0.347162	98.2083	189.067	1.98881
K	0.65	85246.2	81.3669	2791.59	6.67899	37.1633	1.37874	26.779	10.9554	12.1225	1.84204	0.00984215	0.0188018	0.007692	0.0106404	7.86603e-07	0.0095927	0.0039245	0.0133126	0.0004949	30.5368	0.0786599	29.2384	0.211106	95.7569	177.029	1.21747
L	0.7	63567.2	67.013	2008.44	5.9394	24.1902	1.40396	0	0	4.63292	2.03326	0.00708103	0	0	0.005392	1.02266e-06	0	0	0.0120443	0.0006999	31.6501	0.0993657	30.9576	0.317591	97.8218	186.917	1.82157
M	0.75	61263.5	47.4102	1860.13	5.86942	23.795	1.43587	24.5549	9.27385	1.42158	2.0087	0.00655814	0.0258733	0.0097721	0.0115546	9.99319e-07	0.0132007	0.0049858	0.0127921	0.000773	32.9351	0.107003	32.7055	0.339507	99.3109	196.915	1.93651
N	0.8	93205.9	57.3487	2664.18	6.61684	32.2636	1.54407	4.11206	10.4235	0	0	0.00939295	0.0030252	0.0076684	0.0100438	7.84188e-07	0.0015435	0.0039124	0.0121101	0.0005803	34.9848	0.089516	35.4311	0.318341	101.284	212.394	1.80027
O*	0.9	45083.2	55.0937	1204.14	7.24103	17.9997	1.12144	7.4357	9.70911	0	0	0.00424537	0.0121032	0.0158039	0.0299699	1.61614e-06	0.0061751	0.0080632	0.0149482	0.0009356	37.4402	0.229746	38.7138	0.511036	103.41	230.864	2.86055
P*	1.1	63619.5	58.9186	1668.55	5.96853	17.6188	1.27253	0	0	3.41239	1.84471	0.00588271	0	0	0	0	0	0	0.0105594	0.0007636	38.1286	0.140886	37.5133	0.358084	98.3951	224.132	2.01189
Q*	1.5	65613.6	60.0508	1696.4	5.59379	23.8046	1.43789	0	0	4.75216	1.84535	0.00598091	0	0	0.0166269	1.28067e-06	0	0	0.0140324	0.0008489	38.678	0.13236	37.8364	0.349731	97.833	225.946	1.96299
R*	3.5	28531.1	55.5547	649.962	5.46897	11.5506	1.1164	0	0	13.6754	1.94605	0.00229153	0	0	0.0184125	3.32073e-06	0	0	0.0177712	0.0017241	43.8966	0.37912	37.6109	0.952172	85.687	224.68	5.34814
S	6	4824.78	37.9867	92.5173	2.75003	4.94314	1.09147	0	0	3.35479	1.75787	0.000326183	0	0	0.212834	2.35e-05	0	0	0.0534293	0.0119039	52.15	1.60359	41.3039	5.81819	79.216	245.304	32.308
																										Tg: 174 ± 2 Ma
																										Tp: 226 ± 3 Ma
KA004 schist; zone 35, 4100361.46, 493325.93 (J: 3.524x10-3 ± 0.020)
A	0.25	47848.1	59.2366	2815.07	11.4128	40.3377	1.72701	0	0	12.3344	1.44906	0.00992491	0	0	0.0166238	6.73211e-07	0	0	0.0143292	0.0006162	16.9972	0.0720507	15.6859	0.167678	92.302	97.0576	1.0101
B	0.3	38101.3	54.5574	1706.4	6.1855	24.9732	1.38581	0.338618	10.4061	0.233337	1.75567	0.00601615	0.0003889	0.0119526	0.0231829	1.2223e-06	0.0001984	0.0060983	0.014635	0.0008139	22.3285	0.0870241	22.2849	0.319255	99.8184	136.379	1.88175
C	0.33	131468	74.7641	4801.57	10.4121	62.8791	1.54414	0	0	0	0	0.0169286	0	0	0.0144023	3.88174e-07	0	0	0.0130955	0.0003228	27.3802	0.0613812	27.4296	0.143778	100.191	166.45	0.833442
D	0.36	37190.7	59.5984	1181.94	4.93565	18.6618	1.22928	11.494	10.2833	10.3951	2.8114	0.00416709	0.0190605	0.017053	0.0203501	1.74388e-06	0.0097247	0.0087005	0.0157892	0.0010421	31.4659	0.140741	28.8383	0.722109	91.6576	174.598	4.16702
E	0.4	424361	215.132	11455	20.1929	150.948	2.25453	6.07285	9.02481	11.5076	2.36817	0.0403862	0.0010391	0.0015442	0.0135693	1.57912e-07	0.0005301	0.0007879	0.0131775	0.0001982	37.046	0.0679516	36.7433	0.0914616	99.1908	219.647	0.514775
F*	0.45	79313.8	56.1059	1957.72	5.9183	23.1742	1.57367	0	0	2.08029	2.21066	0.00690222	0	0	0.0055566	1.01432e-06	0	0	0.0118373	0.0008046	40.5133	0.125782	40.1929	0.359532	99.2167	238.959	2.00201
G*	0.5	45770.2	65.4893	1113.88	4.44855	17.9373	1.32173	0	0	0	0	0.00392715	0	0	0.0324064	1.83292e-06	0	0	0.0161034	0.0011883	41.0906	0.174319	41.1842	0.770821	100.236	244.471	4.27914
H*	0.53	43924.8	61.5224	1080.72	4.35039	12.1783	1.19638	0	0	0	0	0.00381025	0	0	0.0036362	1.88527e-06	0	0	0.0112686	0.0011079	40.6439	0.17323	40.708	0.655068	100.169	241.825	3.64188
I*	0.56	27357.2	54.6472	678.438	3.85523	7.02581	1.1656	0	0	5.98323	2.13633	0.00239193	0	0	0	0	0	0	0.0103559	0.0017191	40.3239	0.242886	37.6827	0.96759	93.4599	224.927	5.42999
J*	0.6	38149.5	53.5192	954.377	3.85523	10.7021	1.31556	8.84719	10.8821	0	0	0.00336479	0.0181694	0.0223487	0.0048506	2.28543e-06	0.0092701	0.0114024	0.0112137	0.0013792	39.9732	0.170933	40.4528	0.845878	101.207	240.405	4.7064
K*	0.65	46768.7	66.5571	1154.23	3.9928	13.899	1.10187	0	0	0	0	0.00406939	0	0	0.0110924	1.82595e-06	0	0	0.0120418	0.0009555	40.5194	0.151566	41.3532	0.498924	102.066	245.409	2.76829
L*	0.7	6977.79	40.1925	170.295	2.29713	0	0	13.3521	10.1079	0	0	0.000600399	0.153675	0.116354	0	0	0.0784058	0.0593646	0	0	40.9747	0.600996	55.5578	4.03288	135.593	322.55	21.4398
M*	0.75	3117.28	42.1929	71.1849	1.83637	0	0	0	0	0	0	0.000250972	0	0	0	0	0	0	0	0	43.7913	1.27574	63.8691	6.89344	145.863	366.203	35.7713
N*	0.8	16565.4	51.7568	414.322	3.25725	4.26593	1.12471	1.93791	12.1392	0	0	0.00146075	0.0091675	0.0574258	0.0044513	5.87249e-06	0.0046773	0.0292989	0.0102961	0.0027158	39.9819	0.338236	41.8078	1.36271	104.574	247.929	7.55044
O*	0.9	31038.9	52.2907	741.556	4.42259	7.56512	1.23684	0	0	5.35978	2.20694	0.00261446	0	0	0	0	0	0	0.0102017	0.001669	41.8564	0.259397	39.6923	0.922264	94.8383	236.17	5.14347
P*	1.1	23433.9	33.0302	546.233	3.93653	5.90767	1.07606	0	0	1.42399	2.54863	0.00192582	0	0	0	0	0	0	0.0108153	0.0019715	42.901	0.315031	42.1179	1.42705	98.1827	249.647	7.89943
Q	1.5	12253.5	44.1217	284.228	2.52076	4.18322	1.13464	0	0	7.39331	2.29428	0.00100209	0	0	0	0	0	0	0.0147178	0.0039941	43.1114	0.412657	35.3397	2.43528	81.98	211.73	13.7668
R	3.5	4226.2	35.1679	93.441	1.87013	1.60217	1.10501	0	0	7.1159	2.13024	0.000329439	0	0	0	0	0	0	0.0171463	0.0118308	45.2285	0.980329	22.4838	6.83181	49.7164	137.55	40.2418
S	6	454.821	44.0368	5.30889	1.32307	3.62526	1.15372	13.6984	9.90312	0	0	1.87172e-05	5.05734	3.8673	5.01646	0.0003955	2.58027	1.97311	0.682866	0.276024	85.6716	22.9056	361.654	128.806	421.418	1482.41	360.024
																										Tg: 201 ± 2 Ma
																										Tp: 241 ± 12 Ma
KA014 schist; zone 35, 4100361.46, 493325.93 (J: 3.520x10-3 ± 0.020)
A	0.25	117369	65.1602	6031.73	12.6502	92.8573	2.10041	6.42623	4.27561	87.1824	3.49233	0.0212657	0.0020882	0.0013894	0.0116838	1.42079e-07	0.0010654	0.0007089	0.0153948	0.0003497	19.4586	0.0422158	15.1404	0.176111	77.8202	93.6699	1.06175
B	0.3	350838	152.514	13013.5	27.7156	182.157	3.41871	13.6574	4.77419	84.7216	2.66248	0.0458808	0.002057	0.0007191	0.0122777	7.35335e-08	0.0010495	0.0003669	0.0139976	0.0002644	26.9596	0.0586014	25.0131	0.0819367	92.79	152.23	0.478209
C	0.35	766045	302.852	22611	47.8601	299.066	3.94594	22.4074	5.09227	91.7754	2.46057	0.0797181	0.0019424	0.0004414	0.0104461	4.51423e-08	0.000991	0.0002252	0.0132266	0.0001767	33.8794	0.0729518	32.6647	0.0776061	96.4232	196.344	0.441993
D	0.4	265545	94.2647	7344.43	16.3892	89.7161	2.49873	0	0	30.7052	2.22359	0.0258938	0	0	0.0043139	1.17422e-07	0	0	0.0122155	0.0003413	36.1559	0.0816969	34.9047	0.120042	96.5474	209.056	0.678879
E	0.45	284116	128.542	7688.9	23.9466	97.0152	2.48057	12.5971	4.62513	31.6952	2.15913	0.0271083	0.0032112	0.001179	0.0067638	1.20572e-07	0.0016383	0.0006016	0.0126176	0.000325	36.9514	0.116291	35.7179	0.140328	96.6695	213.649	0.791587
F	0.5	327776	122.384	8371.44	12.6305	107.883	2.60851	6.31566	5.51841	16.0536	2.3669	0.0295147	0.0014787	0.001292	0.0108256	1.32125e-07	0.0007544	0.0006592	0.012887	0.0003122	39.1541	0.060856	38.5787	0.103607	98.5379	229.715	0.579262
G	0.55	78765.3	83.4605	2014.92	7.49304	22.9274	1.72229	0	0	4.60571	1.84785	0.00710389	0	0	0.0014696	3.82632e-07	0	0	0.0113788	0.0008558	39.091	0.151157	38.4052	0.3116	98.2534	228.745	1.74308
H	0.6	90471.8	61.188	2311.19	7.86781	30.4355	1.72748	1.66912	4.62557	5.53078	2.25549	0.00814842	0.0014155	0.0039227	0.0119651	4.01145e-07	0.0007222	0.0020014	0.0131688	0.0007488	39.1451	0.135863	38.4278	0.3205	98.175	228.872	1.79274
I	0.65	90957.1	72.4291	2269.68	8.74328	26.8905	1.37072	13.0693	4.17235	0.963688	1.98278	0.00800207	0.0112861	0.0036033	0.0063324	3.68485e-07	0.0057582	0.0018384	0.0118477	0.0006056	40.0749	0.157641	39.9458	0.30453	99.6849	237.343	1.69543
J	0.7	215632	120.944	5252.31	13.8864	64.8446	1.97839	12.8604	4.183	5.86967	1.98472	0.0185178	0.0047991	0.001561	0.0085116	1.59633e-07	0.0024485	0.0007964	0.0123459	0.0003781	41.0546	0.110958	40.7183	0.157659	99.1878	241.638	0.875656
K	0.75	23.7922	45.2904	3.30444	1.48249	0.0231736	1.14479	16.0023	4.57394	0	0	1.16503e-05	9.49163	5.04908	0	0	4.84267	2.57606	0.0070129	0.346454	7.20007	14.0815	11.0722	197.26	153.339	68.9748	1205.65
L	0.8	580.832	33.0847	10.1186	1.63066	0	0	0	0	0	0	3.56745e-05	0	0	0	0	0	0	0	0	57.4025	9.81154	283.116	94.6248	493.413	1247.37	300.962
M	0.9	7579.89	47.013	180.214	2.90099	2.37	1.31804	0.616165	5.23162	1.9645	1.94446	0.00063537	0.0067014	0.056899	0.0023502	5.81861e-06	0.0034191	0.0290301	0.0131511	0.0073168	42.0605	0.725587	38.8033	3.29182	92.2623	230.971	18.3916
N	1.1	41160.6	51.1459	1035.21	10.6132	10.0649	1.35303	0	0	0	0	0.00364979	0	0	0	0	0	0	0.0097226	0.0013108	39.7606	0.410615	40.6049	0.773305	102.132	241.008	4.29654
O	1.5	32117.7	55.4283	768.44	4.24385	10.1675	1.17163	0	0	3.0802	1.94366	0.00270924	0	0	0.0105292	1.16276e-06	0	0	0.0132313	0.0015264	41.796	0.241834	40.5955	0.791057	97.1351	240.956	4.3953
P	3.5	34800.4	58.3524	815.973	4.91028	16.8926	1.50448	5.58666	4.32329	6.60483	2.00766	0.00287683	0.0134194	0.010385	0.0502688	1.062e-06	0.0068466	0.0052985	0.0207025	0.001848	42.649	0.266426	40.2304	0.776783	94.3352	238.926	4.32085
Q	6	4123.98	42.6465	90.1921	1.97257	4.54208	1.46146	2.73871	4.43616	3.8921	2.30937	0.000317985	0.059516	0.0964128	0.186956	9.85939e-06	0.0303653	0.0491902	0.0503601	0.0162413	45.7244	1.10618	32.8418	7.69318	71.8287	197.352	43.7908
																										Tg: 196 ± 2 Ma
KA014 schist; zone 35, 4100641.65, 492901.92 (J: 3.520x10-3 ± 0.020)
A	0.25	17819.2	52.2039	1150.15	5.22849	23.9037	1.27129	13.945	10.7015	39.1314	2.04298	0.00405503	0.0237639	0.018237	0.0217643	1.86495e-06	0.0121245	0.0093046	0.020783	0.0011093	15.4929	0.083788	5.33336	0.532846	34.4309	33.5538	3.32131
B	0.3	131207	71.197	5756.4	8.98139	80.9591	1.71863	5.962	10.3493	69.9511	2.26961	0.020295	0.00203	0.0035238	0.0063666	3.60355e-07	0.0010357	0.0017979	0.0140642	0.0002994	22.7932	0.0376523	19.1623	0.122112	84.0813	117.756	0.726437
C	0.33	13488.9	50.1722	485.363	3.98869	9.186	1.13122	37.7809	10.153	2.47638	2.77966	0.00171122	0.152567	0.0410193	0.0430911	4.19473e-06	0.0778404	0.0209282	0.018926	0.0023359	27.7914	0.250692	26.2735	1.72669	94.5434	159.571	10.0366
D	0.36	289592	140.538	8466.5	10.6135	120.806	2.09441	46.7886	9.53783	75.5384	2.53249	0.0298499	0.0108316	0.0022081	0.011191	2.25801e-07	0.0055263	0.0011266	0.0142688	0.000248	34.2044	0.0459791	31.5383	0.099103	92.2133	189.917	0.56644
E	0.4	30258.4	50.1722	866.598	4.60724	11.0328	1.24193	7.9383	9.88791	9.75166	2.13821	0.00305531	0.0179542	0.0223639	0	0	0.0091603	0.0114101	0.0127311	0.0014347	34.9163	0.19445	31.5546	0.757775	90.3794	190.01	4.33096
F	0.45	170888	74.4688	4582.18	8.47965	56.3261	1.69223	19.7342	9.38725	22.7182	2.23273	0.0161551	0.0084412	0.0040154	0.0039019	4.10621e-07	0.0043067	0.0020487	0.0122924	0.00037	37.294	0.0709029	35.8113	0.160714	96.0316	214.176	0.906316
G	0.5	169516	98.3982	4435.05	8.96984	57.7559	1.65169	6.99112	9.8659	21.9864	1.92114	0.0156364	0.0030896	0.0043601	0.0082322	4.45872e-07	0.0015763	0.0022245	0.0130226	0.0003733	38.2219	0.0804242	36.739	0.150824	96.1279	219.4	0.848087
H	0.53	121357	78.9551	3042.39	7.46314	36.4554	1.47113	3.69162	10.0458	16.6131	1.8232	0.0107264	0.0023783	0.0064718	0.0015016	6.61821e-07	0.0012134	0.0033019	0.0119825	0.0004844	39.8888	0.101232	38.2556	0.203721	95.9129	227.908	1.14014
I	0.56	20103.5	43.1478	491.901	3.09703	3.89871	1.16531	7.43224	11.1128	0.451216	1.8957	0.00173426	0.0296141	0.04428	0	0	0.0151092	0.0225918	0.0079258	0.0023695	40.8691	0.271854	40.5937	1.18197	99.3324	240.946	6.56734
J	0.6	23234.2	39.5892	566.196	3.24728	2.17125	1.15079	0	0	1.17735	1.78899	0.00199621	0	0	0	0	0	0	0.0038348	0.0020326	41.0355	0.245516	40.4102	0.973956	98.484	239.927	5.41461
K	0.65	41893.9	41.4661	931.948	4.23193	12.5131	1.18648	0	0	9.96644	2.86754	0.00328572	0	0	0.0042151	2.43327e-06	0	0	0.0134269	0.0012746	44.953	0.208922	41.7563	0.939106	92.8954	247.394	5.1993
L	0.7	27760.3	53.8372	656.891	3.61502	3.77945	1.25365	0	0	1.2391	1.78364	0.00231596	0	0	0	0	0	0	0.0057535	0.0019087	42.2602	0.246586	41.6936	0.846541	98.6664	247.047	4.68772
M	0.75	13499.4	41.4661	310.628	2.64078	4.1269	1.23286	33.7616	10.6253	1.00094	2.19267	0.00109516	0.213029	0.0670677	0.0117482	6.8585e-06	0.108688	0.0342182	0.0132856	0.0039705	43.4582	0.392832	42.5055	2.14266	97.8072	251.537	11.8355
N	0.8	6371.9	36.9771	145.948	1.91292	4.49778	1.02445	1.55984	10.1868	0	0	0.000514561	0.0209478	0.136804	0.142087	1.4e-05	0.0106876	0.0697978	0.0308176	0.0070309	43.6587	0.625808	49.7433	3.56293	113.944	291.081	19.254
O	0.9	18935.7	48.5892	438.253	2.62623	7.69796	1.22708	4.10268	11.2021	0	0	0.00154512	0.0183484	0.0500993	0.0438982	5.12327e-06	0.0093614	0.0255609	0.0175651	0.0028019	43.2073	0.281659	44.0564	1.13654	101.972	260.084	6.24826
P	1.1	55790.3	42.088	1277.35	4.34695	19.4546	1.23821	21.7008	11.1477	5.63866	1.60331	0.00450346	0.0332984	0.0171058	0.021935	1.74928e-06	0.016989	0.0087274	0.0152305	0.0009707	43.6767	0.152245	42.3579	0.402899	96.9861	250.722	2.22652
Q	1.5	49928.6	56.5055	1141.47	5.08639	17.2948	1.4348	4.38694	9.70491	13.293	1.85071	0.00402441	0.0075328	0.0166642	0.0133802	1.70412e-06	0.0038432	0.0085021	0.0151513	0.0012588	43.7407	0.201097	40.2614	0.518645	92.0516	239.099	2.88468
R	3.5	24943.3	42.088	438.284	3.47091	12.325	1.34981	11.534	9.26585	26.4259	1.94801	0.00154523	0.0515797	0.0414387	0.0359154	4.23762e-06	0.0263162	0.0211422	0.028121	0.0030878	56.9112	0.460815	38.9102	1.36576	68.3723	231.567	7.62808
S	6	9445.25	40.0032	121.249	1.89411	5.86991	1.2874	0	0	29.9825	1.85253	0.000427482	0	0	0	0	0	0	0.0484119	0.0106446	77.8994	1.26085	4.05417	4.57365	5.20514	25.5627	28.6348
																										Tg: 193 ± 2 Ma
KA026, schist; zone 35, 4099951.15, 494612.23 (J: 3.520x10-3 ± 0.020)
A	0.25	373860	239.59	7302.84	15.1518	249.828	4.33383	54.6927	5.40343	733.558	5.96826	0.0257472	0.0146789	0.0014505	0.0271324	1.48335e-07	0.0074892	0.0007401	0.0342097	0.0005977	51.1938	0.111167	21.2018	0.250114	41.417	129.663	1.47593
B	0.3	253031	164.248	5954.99	18.9217	78.6867	2.19338	24.1544	4.77345	35.4008	2.5323	0.0209952	0.0079501	0.0015713	0.0082612	1.60686e-07	0.0040561	0.0008017	0.0132136	0.0003707	42.4905	0.1378	40.7131	0.18337	95.8235	241.276	1.01716
C	0.35	410606	152.803	8349.43	16.4016	104.278	2.4589	13.3366	4.65761	40.6889	2.59905	0.0294371	0.0031307	0.0010934	0.0051628	1.11811e-07	0.0015973	0.0005578	0.0124892	0.0002955	49.1778	0.098323	47.72	0.133295	97.0416	279.73	0.723798
D	0.4	2370536	1285.86	45431.3	171.487	532.839	13.9785	59.0643	21.4374	0	0	0.160174	0.0025482	0.0009249	0.0077496	9.45828e-08	0.0013001	0.0004719	0.0117284	0.0003109	52.1785	0.198979	52.6165	0.212339	100.845	306.124	1.13626
E*	0.45	3006752	1102.23	56771.3	97.9961	696.597	9.86373	80.7633	19.7032	0	0	0.200155	0.0027883	0.0006803	0.0101943	6.95647e-08	0.0014226	0.0003471	0.0122702	0.000175	52.9625	0.0934603	53.1954	0.103183	100.445	309.22	0.551204
F*	0.5	380288	190.609	7125.69	17.6647	92.1613	2.18277	28.1632	4.64089	5.58932	1.84727	0.0251226	0.0077466	0.0012767	0.0123697	1.30555e-07	0.0039523	0.0006514	0.0129337	0.000308	53.3685	0.134979	53.1319	0.155125	99.5619	308.88	0.828836
G*	0.55	400282	140.893	7439.39	13.8961	89.1299	2.30072	33.591	5.08413	11.1774	1.84848	0.0262286	0.00885	0.0013396	0.0059166	1.36988e-07	0.0045153	0.0006835	0.0119808	0.0003101	53.8058	0.102273	53.3548	0.125707	99.167	310.07	0.671212
H*	0.6	535806	215.577	9876.54	17.6647	128.078	2.81162	44.5954	5.37747	15.6747	1.94745	0.0348212	0.00885	0.0010673	0.0116755	1.09142e-07	0.0045153	0.0005445	0.0129679	0.0002856	54.2503	0.0994543	53.7741	0.114891	99.1273	312.308	0.612699
I*	0.65	695058	240.59	12902.3	18.9217	161.296	2.348	55.4975	4.81327	21.894	1.9505	0.0454889	0.0084307	0.0007313	0.0087859	7.47836e-08	0.0043014	0.0003731	0.0125013	0.0001829	53.8709	0.0811747	53.3618	0.0922834	99.0602	310.108	0.492737
J	0.7	800025	416.171	14743.2	22.7109	191.848	2.34619	51.9086	4.8796	14.479	2.36883	0.0519793	0.0069009	0.0006488	0.0126171	6.63471e-08	0.0035208	0.000331	0.0130127	0.0001604	54.2639	0.0882274	53.9682	0.100083	99.4603	313.343	0.533423
K	0.75	710765	315.703	13092.5	20.1977	161.615	2.67153	44.7065	5.80799	15.6135	1.76349	0.0461595	0.0066927	0.0008695	0.0084172	8.89212e-08	0.0034147	0.0004436	0.0123441	0.0002049	54.2879	0.0871516	53.9293	0.0955378	99.3447	313.136	0.509258
L	0.8	502150	165.549	9171.25	27.7403	116.991	2.52469	35.8865	5.18308	6.96264	2.04789	0.0323345	0.0076694	0.0011079	0.0113457	1.13299e-07	0.0039129	0.0005653	0.0127562	0.000278	54.7526	0.166591	54.5235	0.178824	99.5867	316.3	0.951538
M	0.9	352458	227.388	6403.83	13.9335	73.3215	1.82244	9.24147	4.73662	2.20145	2.80646	0.0225776	0.0028285	0.0014497	0.0040614	1.48253e-07	0.0014431	0.0007397	0.0114496	0.0002857	55.0386	0.124907	54.9332	0.180763	99.8138	318.479	0.960698
N	1.1	509080	189.78	8991.23	16.4397	116.587	2.22079	19.9363	5.69517	9.81525	2.25395	0.0316998	0.0043459	0.0012415	0.0122224	1.2696e-07	0.0022173	0.0006334	0.0129668	0.0002481	56.6197	0.105654	56.2911	0.129028	99.4248	325.681	0.683009
O	1.5	375116	164.749	6645.62	15.1861	81.0632	1.95522	7.38732	4.82561	0	0	0.0234301	0.0021787	0.0014232	0.0097704	1.45543e-07	0.0011116	0.0007261	0.012198	0.0002955	56.4456	0.131346	56.6797	0.201326	100.42	327.737	1.06451
P	3.5	237696	98.7758	4167.97	12.5572	49.2072	1.69583	28.2475	4.84206	3.45105	1.84787	0.0146948	0.0132835	0.0022773	0.0056344	2.32886e-07	0.0067773	0.0011619	0.011806	0.0004084	57.0293	0.173444	56.7799	0.217616	99.5675	328.267	1.1503
Q	6	6812.5	32.5553	79.9792	2.13293	3.14613	1.05093	0	0	2.43837	2.10689	0.000281978	0	0	0.135738	1.08e-05	0	0	0.0393369	0.0131818	85.1784	2.30777	76.0717	8.13269	89.3127	427.464	40.6887
																										Tg: 303 ± 3 Ma
																										Tp: 309 ± 3 Ma
KA026 schist; zone 35, 4099951.15, 494612.23 (J: 3.515x10-3 ± 0.020)
A	0.25	242998	89.8539	4510.63	8.34347	66.2674	1.78272	13.7738	10.4408	52.4238	2.15433	0.0159029	0.0059851	0.0045368	0.0106783	4.63948e-07	0.0030536	0.0023147	0.0146914	0.0003962	53.8722	0.101621	50.3997	0.171554	93.5593	294.223	0.924097
B	0.3	247004	123.408	4451.41	8.59877	54.2254	1.70449	9.39945	10.3549	12.1085	2.67085	0.0156941	0.0041387	0.0045594	0.0057459	4.6625e-07	0.0021116	0.0023262	0.0121816	0.0003836	55.489	0.110715	54.6742	0.209817	98.5368	317.102	1.11596
C*	0.3245	110008	74.7971	1998.08	7.21909	25.1402	1.35275	0	0	7.11036	1.94104	0.00704451	0	0	0.0071817	1.116e-06	0	0	0.0125822	0.0006785	55.0566	0.202412	53.9897	0.351554	98.0683	313.458	1.8736
D*	0.36	12411	41.1856	229.65	3.48122	3.44084	0.991505	0	0	2.05883	1.73152	0.000809663	0	0	0.0153741	8.87644e-06	0	0	0.014983	0.0043234	54.043	0.838627	51.3608	2.38874	95.0438	299.393	12.8304
E*	0.4	18122.2	53.2707	340.721	2.88218	3.49531	1.14843	0	0	2.49849	1.59238	0.00120126	0	0	0	0	0	0	0.0102586	0.0033717	53.1878	0.476309	50.9947	1.4689	95.8824	297.425	7.89836
F*	0.45	38303.1	59.8281	654.204	4.97653	8.52772	1.23162	11.2857	9.58912	0	0	0.00230649	0.0338119	0.0287302	0.0166239	2.93802e-06	0.017251	0.0146583	0.0130353	0.0018852	58.5491	0.454675	59.2889	0.937139	101.268	341.481	4.91748
G*	0.5	27447.5	106.956	483.649	5.59933	6.28813	1.23763	31.0052	10.3235	1.05509	2.33468	0.00170517	0.12565	0.0418615	0.0112194	4.28085e-06	0.0641069	0.0213579	0.0130014	0.0025634	56.7509	0.69324	56.1045	1.59636	98.8619	324.693	8.45496
H*	0.53	20260.5	50.0972	357.653	3.00352	3.72276	1.23421	5.39131	8.90439	0	0	0.00126096	0.0295453	0.0487982	0.0031167	4.99021e-06	0.0150741	0.024897	0.0104088	0.003452	56.6484	0.495919	57.9403	1.4172	102.285	334.39	7.46582
I*	0.56	12258	45.4283	234.214	2.45543	3.39139	1.14305	0.145411	10.4687	0	0	0.000825756	0.0012169	0.0876065	0.0290211	8.95884e-06	0.0006208	0.0446972	0.0144798	0.0048827	52.3367	0.581956	54.0984	2.87359	103.372	314.037	15.3098
J*	0.6	147453	90.587	2703.83	7.15651	37.7479	1.39153	19.5636	9.87698	2.02055	2.21013	0.00953273	0.0141816	0.0071599	0.0185037	7.32188e-07	0.0072355	0.003653	0.0139609	0.000516	54.5349	0.148181	54.3099	0.285235	99.5923	315.163	1.51872
K*	0.65	54964.6	58.0612	1025.27	6.78422	13.8861	1.14046	30.7605	10.7676	0	0	0.00361474	0.0588045	0.0205879	0.0215307	2.10536e-06	0.0300023	0.010504	0.0135438	0.001116	53.6098	0.359227	54.8557	0.711637	102.328	318.067	3.78298
L*	0.7	14682.9	46.5482	270.296	4.20652	4.02774	1.07823	10.9397	10.5038	0	0	0.000952966	0.0793271	0.0761767	0.0254882	7.79e-06	0.040473	0.0388657	0.0149012	0.0039958	54.3217	0.862752	54.4755	2.59994	100.286	316.045	13.8365
M*	0.75	9481.88	44.9747	178.252	1.90151	2.00791	1.16677	9.56655	10.778	2.54108	1.63493	0.000628452	0.105191	0.118517	0	0	0.0536688	0.0604679	0.0112645	0.0065467	53.1938	0.621012	48.9408	2.79935	92.0065	286.347	15.145
N*	0.8	6999.44	40.5265	121.433	1.90151	1.57767	1.08537	3.72766	10.4211	2.92756	1.72134	0.000428131	0.0601664	0.168205	0	0	0.0306972	0.0858187	0.012992	0.0089403	57.6401	0.962301	50.4427	4.31841	87.5161	294.454	23.2586
O*	0.9	25367.9	41.626	455.187	3.10596	5.03247	1.28947	10.841	10.9845	2.44017	1.5748	0.00160483	0.0466807	0.0472993	0	0	0.0238167	0.0241323	0.0110558	0.0028338	55.7307	0.391118	54.13	1.10085	97.1314	314.205	5.86453
P*	1.1	18476.2	41.0395	324.292	4.66707	1.60527	1.06301	22.0165	8.72018	1.23767	2.03002	0.00114334	0.133066	0.0527389	0	0	0.0678909	0.0269076	0.0049501	0.0032787	56.974	0.829653	55.8393	2.03851	98.0091	323.288	10.8052
Q*	1.5	20088	35.9999	330.491	3.21776	6.26083	1.16326	0	0	7.64651	2.36643	0.00116519	0	0	0.0230168	6.47129e-06	0	0	0.018944	0.0035246	60.7825	0.601738	53.8652	2.2039	88.6274	312.794	11.7499
R*	3.5	29855.8	55.358	494.546	4.17905	8.39172	1.10465	0	0	8.05647	2.36542	0.00174359	0	0	0.0189543	4.4029e-06	0	0	0.0169685	0.0022383	60.3702	0.522282	55.4965	1.50723	91.9352	321.47	7.99714
S*	6	19900.2	43.1478	353.697	2.63469	6.19197	1.23673	0	0	4.57602	2.28097	0.00124701	0	0	0.0258942	6.38199e-06	0	0	0.0175064	0.003499	56.2635	0.4365	52.3926	1.96837	93.1279	304.926	10.5401
																										Tg: 309 ± 4 Ma
																										Tp: 314 ± 4 Ma
* heating increment used in calculation of plateau or preferred age
† x10-14
†† Tg: total gas age; Tp: plateau age
